# Supplementary material
Source: Elsevier journal article supplement (https://publikationen.ub.uni-frankfurt.de/files/61449/mmc2.pdf)

A

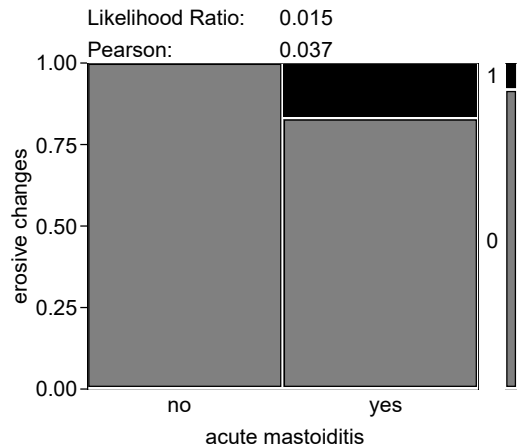

B

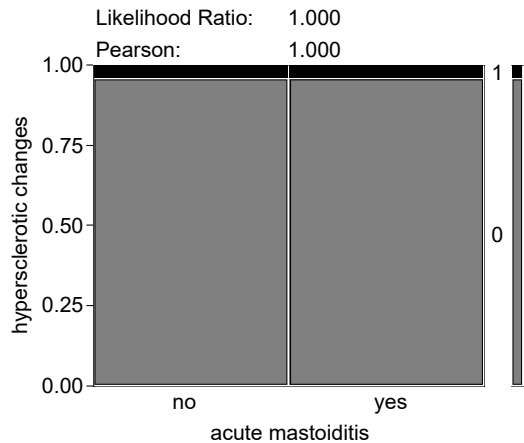

C

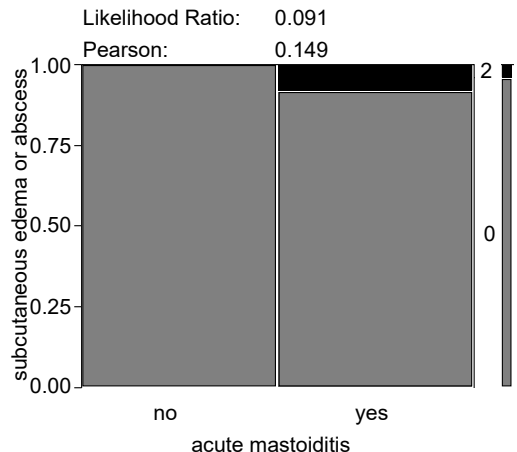

D

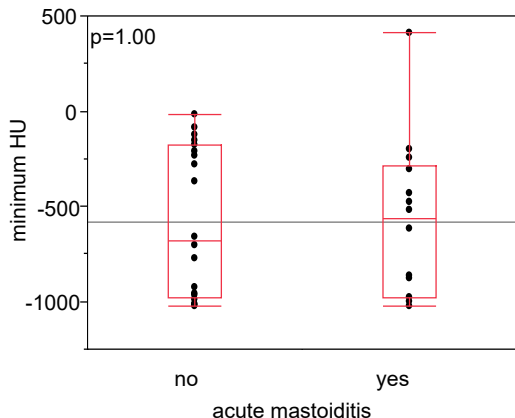

Supplement: mmc2 [file mmc2.pdf]
